# Supplementary material
Source: Royal Society of Chemistry journal article supplement (doi:10.1039/d5bm01824b)
Supplement: d5bm01824b1.pdf [file d5bm01824b1.pdf]

## Supplementary Information

### Modeling Hypoxia Integrated Glioblastoma Microenvironment to Mimic Tumor Heterogeneity and Chemoresistance

Seyma Isik<sup>1,5</sup>, Deniz Yücel<sup>2,4,5\*\*</sup>, Vasif Hasirci<sup>3,4,5,6\*</sup>

<sup>1</sup> Department of Medical Biotechnology, Graduate School of Health Sciences, Acibadem University, 34752 İstanbul, Türkiye

<sup>2</sup> Department of Histology and Embryology, School of Medicine, Acibadem University, 34752 İstanbul, Türkiye

<sup>3</sup> Departments of Biomedical Engineering, Faculty of Engineering and Natural Sciences, Acibadem University, 34752 İstanbul, Türkiye

<sup>4</sup> Department of Biomaterials, Graduate School of Natural and Applied Sciences, Acibadem University, 34752 İstanbul, Türkiye

<sup>5</sup> Biomaterials Application and Research Center, Acibadem University, 34752 İstanbul, Türkiye

<sup>6</sup> BIOMATEN, Center of Excellence in Biomaterials and Tissue Engineering, Research Park Bldg., Middle East Technical University, 06800 Ankara, Türkiye

\* Corresponding author: [vasifhasirci@gmail.com](mailto:vasifhasirci@gmail.com)

\*\* Co-corresponding author: [deniz.yucel@acibadem.edu.tr](mailto:deniz.yucel@acibadem.edu.tr)

Supplementary Table 1 Primer list

| Gene                                               | Forward and Reverse Sequence                                                       |
|----------------------------------------------------|------------------------------------------------------------------------------------|
| Glial Fibrillary Acidic Protein (GFAP)             | Forward: 5'-CTGGAGAGGAAGATTGAGTCGC-3'<br>Reverse: 5'-ACGTCAAGCTCCACATGGACCT-3'     |
| Hypoxia-Inducible Factor 1 Alpha (HIF-1 $\alpha$ ) | Forward: 5'-TATGAGCCAGAAGAAGCTTTTAGGC-3'<br>Reverse: 5'-CACCTCTTTTGGCAAGCATCCTG-3' |
| SRY-Box Transcription Factor 2 (SOX2)              | Forward: 5'-GCTACAGCATGATGCAGGACCA-3<br>Reverse: 5'-TCTGCGAGCTGGTCATGGAGTT-3       |
| Chitinase-3-Like Protein 1 (CHI3L1)                | Forward: 5'-CCACAGTCCATAGAATCCTCGG-3<br>Reverse: 5'-TGCCTGTCCTTCAGGTACTGCA-3       |
| Matrix Metalloproteinase 2 (MMP2)                  | Forward: 5'-AGCGAGTGGATGCCGCCTTTAA -3<br>Reverse: 5'-CATTCCAGGCATCTGCGATGAG -3     |
| Matrix Metalloproteinase 9 (MMP9)                  | Forward: 5'-GCCACTACTGTGCCTTTGAGTC-3<br>Reverse: 5'-CCCTCAGAGAATCGCCAGTACT-3       |

|                                                         |                                                                                |
|---------------------------------------------------------|--------------------------------------------------------------------------------|
| Nestin (NES)                                            | Forward: 5'-TCAAGATGTCCCTCAGCCTGGA-3<br>Reverse: 5'-AAGCTGAGGGAAGTCTTGGAGC-3   |
| Transforming Growth Factor Beta (TGF- $\beta$ )         | Forward: 5'-TACCTGAACCCGTGTTGCTCTC -3<br>Reverse: 5'-GTTGCTGAGGTATCGCCAGGAA-3  |
| Epidermal Growth Factor Receptor (EGFR)                 | Forward: 5'-AACACCCTGGTCTGGAAGTACG -3<br>Reverse: 5'-TCGTTGGACAGCCTTCAAGACC -3 |
| Cluster of Differentiation 44 (CD44)                    | Forward: 5'-CCAGAAGGAACAGTGGTTTGGC-3<br>Reverse: 5'-ACTGTCCTCTGGGCTTGGTGTT-3   |
| Ki-67 Antigen (Ki-67)                                   | Forward: 5'-GAAAGAGTGGCAACCTGCCTTC-3<br>Reverse: 5'-GCACCAAGTTTTACTACATCTGCC-3 |
| <b>Glyceraldehyde-3-Phosphate Dehydrogenase (GAPDH)</b> | Forward: 5'-GTCTCCTCTGACTTCAACAGCG-3<br>Reverse: 5'-ACCACCCTGTTGCTGTAGCCAA-3   |
